# Supplementary material for: Unaltered Responses of Distal Motor Neurons to Non-Targeted Thoracic Spinal Cord Stimulation in Chronic Pain Patients
Source: PubMed Central journal article supplement — Pain Ther. 2024 Oct 18;13(6):1645–58. doi: 10.1007/s40122-024-00670-x (PMC11543980; doi:10.1007/s40122-024-00670-x), 2024-10-18
Supplement: 40122_2024_670_MOESM1_ESM.pdf [file 40122_2024_670_MOESM1_ESM.pdf]

# Unaltered Responses of Distal Motor Neurons to Non-Targeted Thoracic Spinal Cord Stimulation in Chronic Pain Patients

Carolyn Riera<sup>1,#</sup> Daniela Souza de Oliveira<sup>2,#</sup>, Matthias Borutta<sup>3</sup>, Martin Regensburger<sup>3</sup>, Yining Zhao<sup>1</sup>, Steffen Brenner<sup>4</sup>, Alessandro Del Vecchio<sup>2</sup>, Thomas Kinfe<sup>1,2,4</sup>

<sup>1</sup>Division of Functional Neurosurgery and Stereotaxy, Friedrich-Alexander University (FAU) Erlangen-Nürnberg, Erlangen, Germany

<sup>2</sup>Department of Artificial Intelligence in Biomedical Engineering (AIBE), Friedrich-Alexander University (FAU) Erlangen-Nürnberg, Erlangen, Germany

<sup>3</sup>Department of Neurology, Friedrich-Alexander University (FAU) Erlangen-Nürnberg, Erlangen, Germany

<sup>4</sup> Division of Neuromodulation and Neuroprosthetics, Department of Neurosurgery, Medical Faculty Mannheim, Ruprechts-Karl-University Heidelberg, Mannheim, Germany

#Both authors contributed equally

## Corresponding author

Thomas M. Kinfe, MD

Dr. Rolf M. Schwiete Endowed Chair for Neuromodulation and Neuroprosthetics  
Full Professor and Head of the Division of Neuromodulation and Neuroprosthetics  
Medical Faculty Mannheim, Ruprechts-Karl-University Heidelberg, Mannheim,  
Germany

Theodor-Kutzer-Ufer 1-3, 68167 Mannheim, Germany

thomasmehari.kinfe@medma.uni-heidelberg.de / [thomas.kinfe@umm.de](mailto:thomas.kinfe@umm.de)

## Additional Information

**Table:** Subject specific differences ( $p < .05$ ) (15 %MVT red, 30 %MVT blue)

### Recruitment Threshold

|                            | 1 | 2 | 3 | 4 | 5 | 6  | 7 | 8  | 9 |
|----------------------------|---|---|---|---|---|----|---|----|---|
| Off (1 week) - Burst       |   |   | X |   |   |    |   |    |   |
| Off (1 week) - Off (acute) |   | X |   |   |   |    |   |    |   |
| Off (1 week) - Tonic       |   |   |   | X | X | X  | X | XX |   |
| Burst - Off (acute)        |   |   |   |   |   |    |   |    |   |
| Burst - Tonic              |   | X |   | X | X |    |   | XX |   |
| Off (acute) - Tonic        |   | X |   | X |   | XX | X | XX |   |

### Derecruitment Threshold

|                            | 1 | 2  | 3  | 4 | 5 | 6 | 7 | 8  | 9 |
|----------------------------|---|----|----|---|---|---|---|----|---|
| Off (1 week) - Burst       |   | X  | XX |   |   |   | X | X  |   |
| Off (1 week) - Off (acute) |   | X  |    | X |   | X |   | X  |   |
| Off (1 week) - Tonic       | X |    |    | X |   | X | X | X  |   |
| Burst - Off (acute)        |   | XX | X  | X | X | X |   | XX |   |
| Burst - Tonic              |   | XX |    | X | X | X |   | X  |   |
| Off (acute) - Tonic        |   |    |    |   |   |   | X | XX |   |

### Discharge rate across contraction

|                            | 1 | 2 | 3  | 4  | 5  | 6 | 7 | 8  | 9 |
|----------------------------|---|---|----|----|----|---|---|----|---|
| Off (1 week) - Burst       | X |   | XX | X  | X  |   | X | XX |   |
| Off (1 week) - Off (acute) |   | X | XX | X  | X  |   |   | XX |   |
| Off (1 week) - Tonic       |   | X |    | X  |    |   | X | X  |   |
| Burst - Off (acute)        |   | X |    | XX | XX | X | X | X  |   |
| Burst - Tonic              |   | X |    | XX |    |   | X |    |   |
| Off (acute) - Tonic        |   | X |    |    |    | X | X | X  |   |

### Discharge rate at recruitment

|                            | 1 | 2 | 3  | 4 | 5 | 6 | 7 | 8 | 9 |
|----------------------------|---|---|----|---|---|---|---|---|---|
| Off (1 week) - Burst       |   |   |    |   |   |   |   | X |   |
| Off (1 week) - Off (acute) |   |   |    |   |   |   |   | X |   |
| Off (1 week) - Tonic       |   |   | X  |   | X |   |   | X |   |
| Burst - Off (acute)        |   | X |    |   |   |   |   |   |   |
| Burst - Tonic              |   |   |    |   | X |   |   |   |   |
| Off (acute) - Tonic        |   |   | XX |   |   |   |   |   |   |

### Discharge rate at plateau

|                            | 1 | 2  | 3  | 4  | 5  | 6 | 7  | 8  | 9 |
|----------------------------|---|----|----|----|----|---|----|----|---|
| Off (1 week) - Burst       | X |    | XX | X  | X  |   | XX | X  |   |
| Off (1 week) - Off (acute) |   | X  | XX |    | X  |   |    | XX |   |
| Off (1 week) - Tonic       |   | XX |    |    |    | X | X  | X  |   |
| Burst - Off (acute)        |   | X  |    | XX | XX | X |    | X  |   |
| Burst - Tonic              |   | X  | X  | XX | X  |   | X  | X  |   |
| Off (acute) - Tonic        |   | X  |    |    |    | X | X  | X  |   |

**Discharge rate at derecruitment**

|                            | 1 | 2 | 3 | 4 | 5 | 6  | 7 | 8 | 9 |
|----------------------------|---|---|---|---|---|----|---|---|---|
| Off (1 week) - Burst       |   |   | X |   |   | X  |   |   |   |
| Off (1 week) - Off (acute) | X |   |   |   |   |    |   |   |   |
| Off (1 week) - Tonic       |   |   |   |   | X |    |   | X |   |
| Burst - Off (acute)        | X |   |   |   |   |    | X |   |   |
| Burst - Tonic              |   |   |   |   |   | XX |   | X |   |
| Off (acute) - Tonic        |   |   |   | X | X |    |   | X |   |

**Interspike intervall variability**

|                            | 1 | 2 | 3 | 4 | 5  | 6  | 7 | 8  | 9 |
|----------------------------|---|---|---|---|----|----|---|----|---|
| Off (1 week) - Burst       |   |   |   |   | XX | XX | X | X  |   |
| Off (1 week) - Off (acute) |   |   |   | X | X  | X  |   | XX |   |
| Off (1 week) - Tonic       |   | X |   |   |    |    |   | X  |   |
| Burst - Off (acute)        |   |   |   |   |    |    |   |    |   |
| Burst - Tonic              |   |   | X |   | X  | X  | X | X  |   |
| Off (acute) - Tonic        |   |   | X | X | XX |    |   | X  |   |
